# Supplementary material for: ZnO nanosheet/squeezebox-like porous carbon composites synthesized by in situ pyrolysis of a mixed-ligand metal–organic framework
Source: Royal Society of Chemistry journal article supplement (doi:10.1039/c7ta00155j), 2017-01-01
Supplement: c7ta00155j1.pdf [file c7ta00155j1.pdf]

Electronic Supplementary Information (ESI)

# ZnO Nanosheet/Squeezebox-like Porous Carbon Composite Synthesized by In-Situ Pyrolysis of a Mixed-Ligand Metal-Organic Framework

*Ang Li; Huaihe Song\*; Zhuo Bian; Liluo Shi; Xiaohong Chen; Jisheng Zhou*

State Key Laboratory of Chemical Resource Engineering; Beijing Key Laboratory of  
Electrochemical Process and Technology for Materials; Beijing University of Chemical  
Technology; Beijing; 100029; P.R. China.

## SI.1 Charaterization of ZnO/MPC

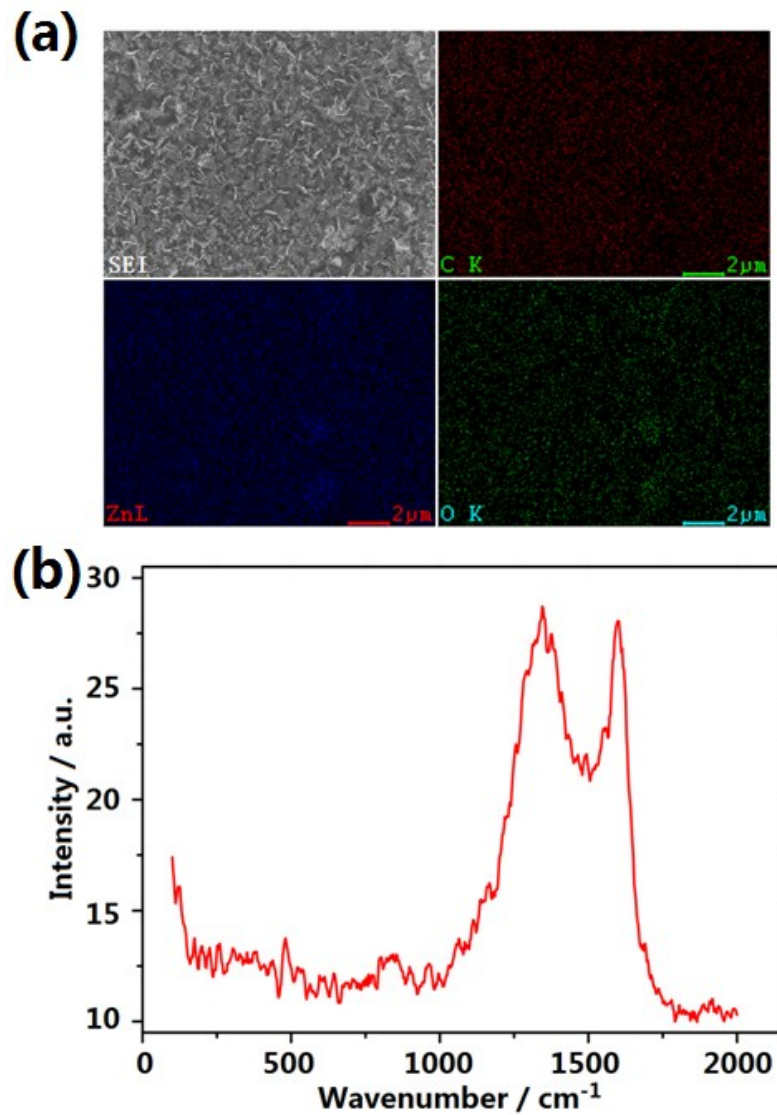

**Fig. S1** (a)EDS mapping profiles and (b) Raman spectrum of ZnO/MPC.

The Raman data of ZnO/MPC<sup>S1</sup>:

**ZnO:** 197 cm<sup>-1</sup> (2Elow 2); 331 cm<sup>-1</sup> (Ehigh 2-Elow 2); 410 cm<sup>-1</sup> (E<sub>1</sub>(TO)); 439 cm<sup>-1</sup> (Ehigh 2);

483 cm<sup>-1</sup> (2LA); 590 cm<sup>-1</sup> (E<sub>1</sub>(LO)); 780 cm<sup>-1</sup> (LA+TO).

**C:** 1344 cm<sup>-1</sup> (D), 1600(G).

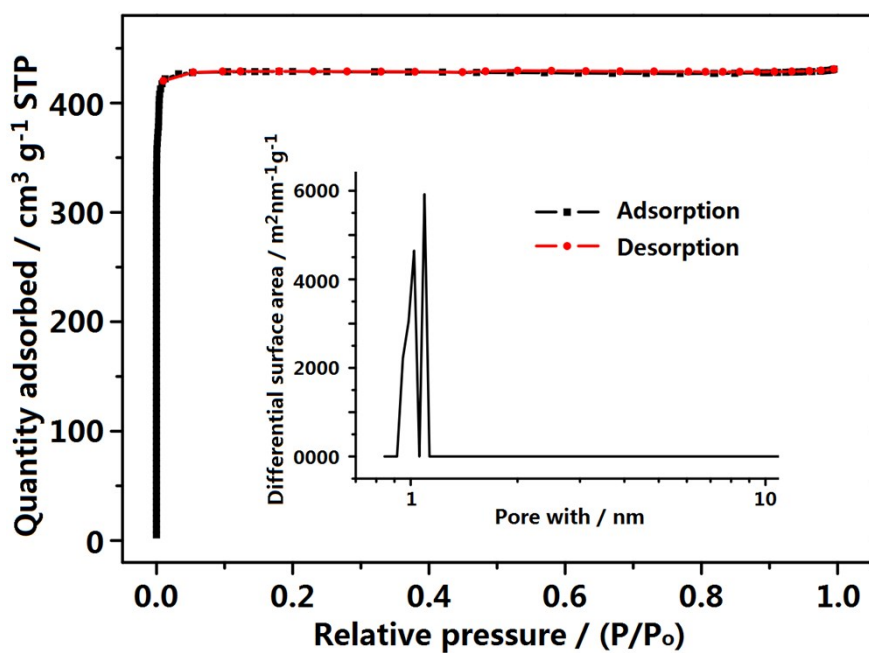

**Fig. S2** N<sub>2</sub> adsorption isotherms of Zn-BDC-TED. The inset is the pore size distribution. The BET specific surface area is 1241 m<sup>2</sup> g<sup>-1</sup>. The single point adsorption total pore volume is 0.666 cm<sup>3</sup> g<sup>-1</sup>, and the t-Plot micropore volume is 0.662 cm<sup>3</sup> g<sup>-1</sup>.

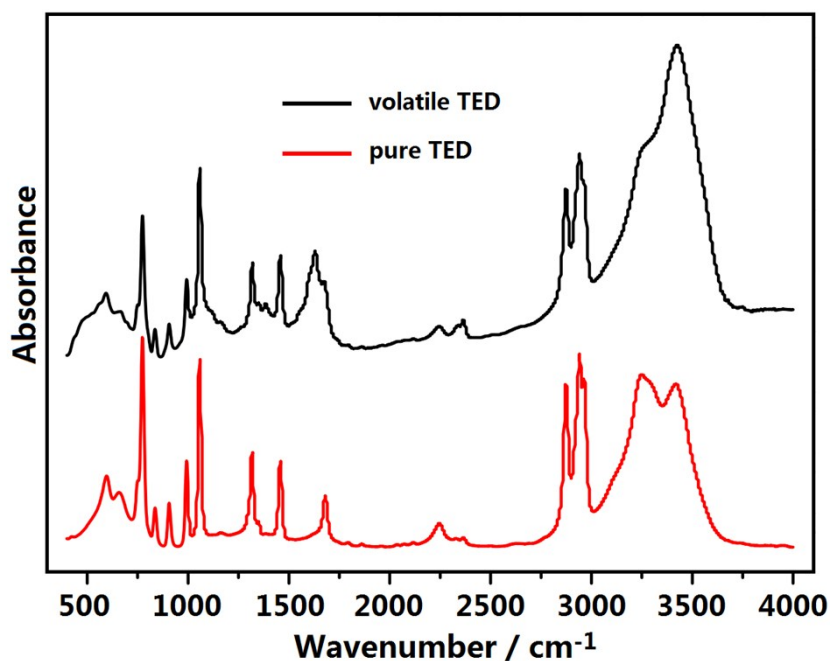

**Fig. S3** FTIR curves of the collected condensate and the commercial TED.

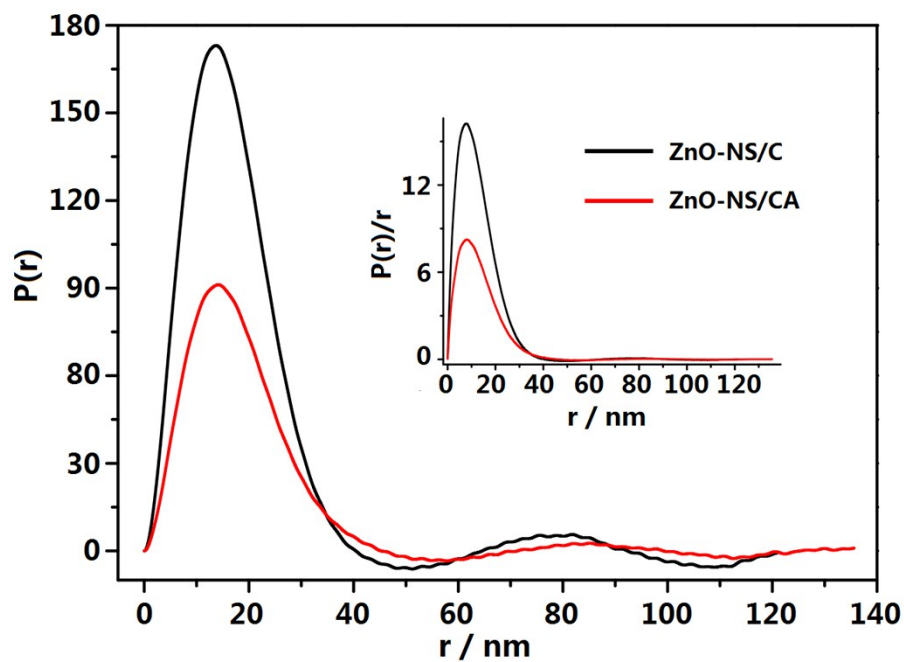

**Fig. S4** The distance distribution function  $P(r)$  of SAXS curves for ZnO/MPC and MPC. The inset is the form of  $P(r)/r$ , which is used to calculate the shape parameters.

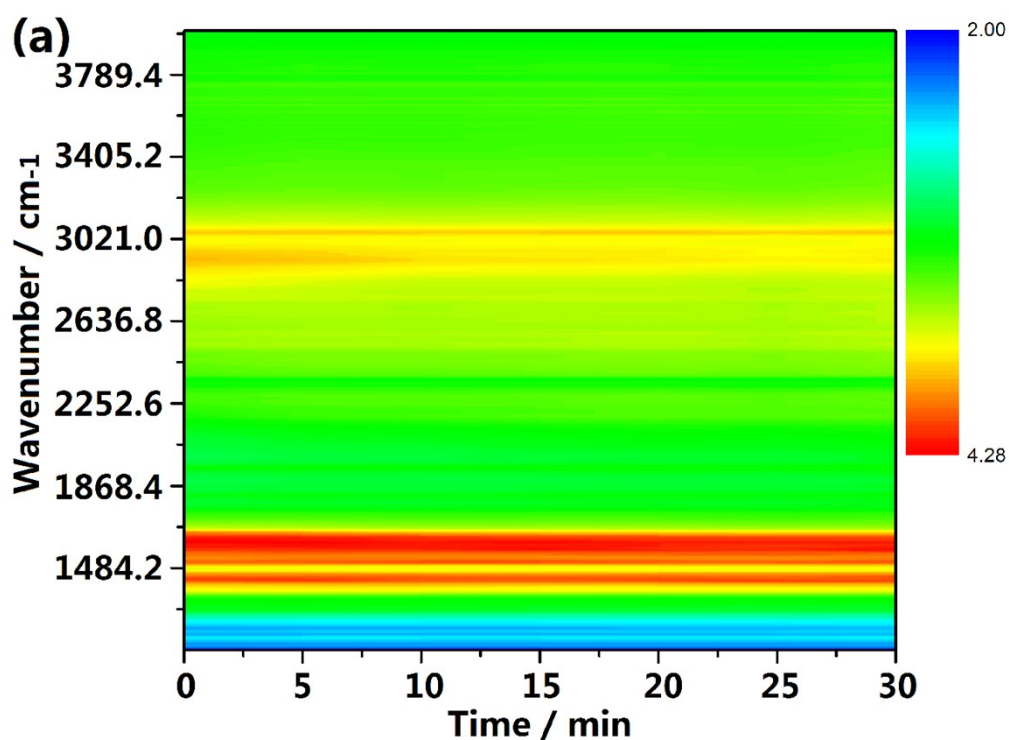

**Fig. S5** In-situ 2D-DRIFT profiles of the pyrolysis of Zn-BDC-TED, which was heated at a constant temperature of 500 °C. (the color bar is the scale of absorbance).

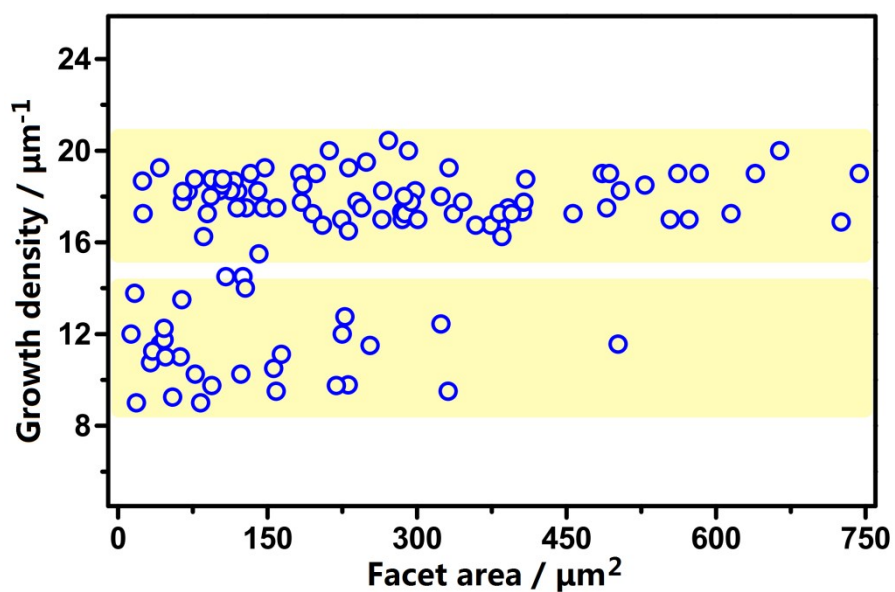

**Fig. S6** The growth density of ZnO nanosheets on different facet of particles. The x-axis is the facet area of the corresponding surface that has ZnO nanosheets on it.

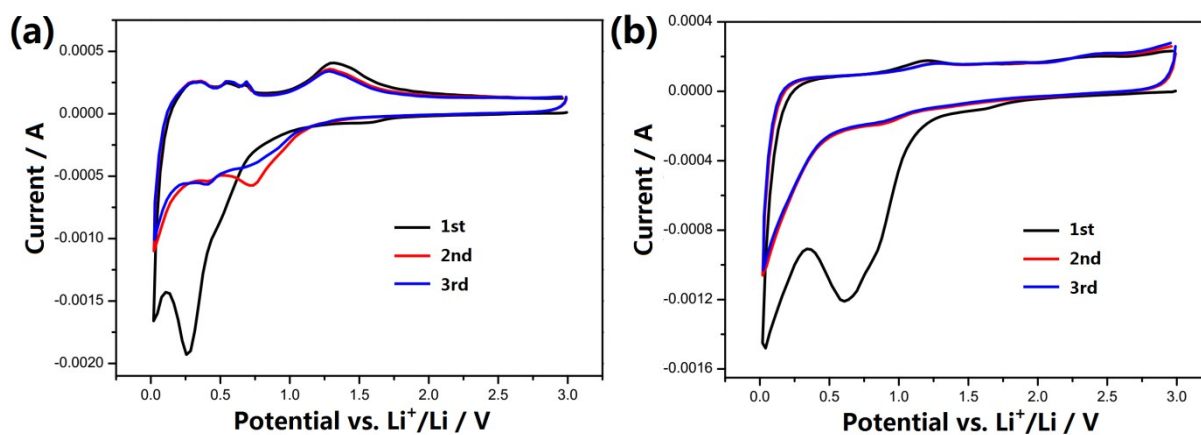

**Fig. S7** Cyclic voltammograms of (a) ZnO/MPC and (b) MPC electrodes with scanning rate at  $0.01 \text{ mV s}^{-1}$  in the range of 0.01-3.0 V.

**Table S1.** The specific capacity values of ZnO nanomaterials in previous literature and this paper.

| Materials      | Current density              | Discharge specific capacity (mAhg <sup>-1</sup> ) | Cycle number | Ref.             |
|----------------|------------------------------|---------------------------------------------------|--------------|------------------|
| ZnO NS         | 0.5C                         | 163                                               | 30           | s2               |
| ZnO NS         | 0.5C                         | 381                                               | 30           | s2               |
| ZnO NS         | 100 mA g <sup>-1</sup>       | 420                                               | 50           | s3               |
| ZnO NS/rGO     | 200 mA g <sup>-1</sup>       | 402                                               | 100          | s4               |
| ZnO ND         | 100 mA g <sup>-1</sup>       | 478                                               | 50           | s5               |
| ZnO ND/CNTs    | 100 mA g <sup>-1</sup>       | 602                                               | 50           | s5               |
| ZnO NR         | 0.1 mA cm <sup>-2</sup>      | 310                                               | 40           | s6               |
| ZnO/CNTs       | 0.2C                         | 460                                               | 100          | s7               |
| ZnO NR/C       | 0.25C                        | 330                                               | 50           | s8               |
| <b>ZnO/MPC</b> | <b>60 mA g<sup>-1</sup></b>  | <b>920</b>                                        | <b>150</b>   | <b>This work</b> |
|                | <b>500 mA g<sup>-1</sup></b> | <b>560</b>                                        | <b>20</b>    |                  |
|                | <b>1 A g<sup>-1</sup></b>    | <b>363</b>                                        | <b>20</b>    |                  |
| <b>MPC</b>     | <b>60 mA g<sup>-1</sup></b>  | <b>974</b>                                        | <b>150</b>   | <b>This work</b> |
|                | <b>500 mA g<sup>-1</sup></b> | <b>515</b>                                        | <b>20</b>    |                  |
|                | <b>1 A g<sup>-1</sup></b>    | <b>404</b>                                        | <b>20</b>    |                  |

NS - nanosheet; ND - nanodisk; NR - nanoribbon; CNTs - carbon nanotubes; rGO - reduced graphene oxides

## References

- s1 R. Cuscó, E. Alarcón-Lladó, J. Ibáñez, L. Artús, J. Jiménez, B. Wang, M. J. Callahan, *Phys. Rev. B*, 2007, **75**, 165202.
- s2 F. Li, L. Yang, G. Xu, H. Xiaoqiang, X. Yang, X. Wei, Z. Ren, G. Shen and G. Han, *J. Alloys Compd.*, 2013, **577**, 663-668.
- s3 X. H. Huang, R. Q. Guo, J. B. Wu and P. Zhang, *Mater. Lett.*, 2014, **122**, 82-85.
- s4 J. Wu, C. Chen, Y. Hao and C. Wang, *Colloids Surf., A*, 2015, **468**, 17-21.
- s5 S. M. Abbas, S. T. Hussain, S. Ali, N. Ahmad, N. Ali and S. Abbas, *J. Mater. Sci.*, 2013, **48**, 5429-5436.
- s6 H. Wang, Q. Pan, Y. Cheng, J. Zhao and G. Yin, *Electrochim. Acta*, 2009, **54**, 2851-2855.
- s7 H. Köse, Ş. Karaal, A. O. Aydın and H. Akbulut, *J. Power Sources*, 2015, **295**, 235-245.
- s8 J. P. Liu, Y. Y. Li, R. M. Ding, J. Jiang, Y. Y. Hu, X. X. Ji, Q. B. Chi, Z. H. Zhu and X. T. Huang, *J. Phys. Chem. C* **2009**, 113, 5336-5339.
